# Antinociception by Spinal and Systemic Oxycodone: Why Does the Route Make a Difference?

## In Vitro and In Vivo Studies in Rats

Kim K. Lemberg, D.D.S.\* Vesa K. Kontinen, M.D., Ph.D.,† Antti O. Siiskonen, M.Sc.,‡ Kaarin M. Viljakka, M.D.,§ Jari T. Yli-Kauhaluoma, Ph.D.,|| Esa R. Korpi, M.D., Ph.D.,# Eija A. Kalso, M.D., Ph.D.\*\*

**Background:** The pharmacology of oxycodone is poorly understood despite its growing clinical use. The discrepancy between its good clinical effectiveness after systemic administration and the loss of potency after spinal administration led the authors to study the pharmacodynamic effects of oxycodone and its metabolites using *in vivo* and *in vitro* models in rats.

**Methods:** Male Sprague-Dawley rats were used in hot-plate, tail-flick, and paw-pressure tests to study the antinociceptive properties of morphine, oxycodone, and its metabolites oxymorphone and noroxycodone.  $\mu$ -Opioid receptor agonist-stimulated GTP $\gamma$ [<sup>35</sup>S] autoradiography was used to study G-protein activation induced by morphine, oxycodone, and oxymorphone in the rat brain and spinal cord. Spontaneous locomotor activity was measured to assess possible sedation or motor dysfunction. Naloxone and the selective  $\kappa$ -opioid receptor antagonist nor-binaltorphimine were used to study the opioid receptor selectivity of the drugs.

**Results:** Oxycodone showed lower efficacy and potency to stimulate GTP $\gamma$ [<sup>35</sup>S] binding in the spinal cord and periaqueductal gray compared with morphine and oxymorphone. This could relate to the fact that oxycodone produced only weak naloxone-reversible antinociception after intrathecal administration. It also suggests that the metabolites may have a role in oxycodone-induced analgesia in rats. Intrathecal oxymorphone produced strong long-lasting antinociception, whereas noroxycodone produced antinociception with very high doses only. Subcutaneous administration of oxycodone and oxymorphone produced thermal and mechanical antinociception that was reversed by naloxone but not by nor-binaltorphimine. Oxymorphone was more potent than oxycodone, particularly in the hot-plate and paw-pressure tests.

**Conclusions:** The low intrathecal potency of oxycodone in rats seems to be related to its low efficacy and potency to stimulate  $\mu$ -opioid receptor activation in the spinal cord.

OXYCODONE is an opioid analgesic with high oral bioavailability in humans (> 60%)<sup>1</sup> compared with mor-

phine (19–30%),<sup>2</sup> whereas its physicochemical properties are similar to those of morphine.<sup>3</sup> Oxycodone is increasingly used worldwide to treat acute and chronic pain.

Opioids bind to specific G protein-coupled  $\mu$ -,  $\delta$ -, and  $\kappa$ -opioid and nociceptin/orphanin FQ receptors.<sup>4–10</sup> Oxycodone shows  $\mu$ -opioid receptor selectivity,<sup>11</sup> but it has a lower binding affinity to the  $\mu$ -opioid receptor compared with morphine in the rat brain homogenates.<sup>12</sup> Oxycodone has also been shown to act as a  $\mu$ -opioid receptor agonist in the mouse paraffin writhing, hot-plate, and tail-flick assays.<sup>13</sup>

In humans, intravenous, intramuscular, and oral administration of oxycodone produces pain relief similar to that produced by other  $\mu$ -opioid receptor agonists.<sup>1,14</sup> In postoperative pain, the equianalgesic parenteral dose ratio of oxycodone to morphine has previously been reported as 2:3.<sup>1</sup> Intravenous oxycodone was found to be more potent than intravenous morphine in postoperative pain.<sup>15</sup> Interestingly, Backlund *et al.*<sup>16</sup> found that the epidural dose ratio between morphine and oxycodone was 1:9.8 in humans after abdominal surgery. Another study indicated that twice the dose of oxycodone compared with morphine was needed to achieve comparable analgesia after epidural administration following gynecologic surgery.<sup>17</sup> In rats, both intrathecal<sup>18,19</sup> and intracerebroventricular<sup>20</sup> administered morphine has been shown to induce significantly greater antinociception compared with oxycodone. After subcutaneous and intraperitoneal administration, oxycodone was found to be two to four times more potent than morphine in rats.<sup>19</sup> These results suggest an active role for the metabolites of oxycodone.

Oxycodone is metabolized in humans by hepatic cytochrome P450 (CYP) isoenzymes. The main pathways of metabolism include oxidation to oxymorphone and noroxycodone, conjugation to  $\alpha$ -D-glucuronic acid, and conversion to 6-oxycodol.<sup>21–25</sup> O-demethylation by CYP2D6 leads to the formation of the main active metabolite oxymorphone. Oxymorphone induces antinociception in rodents<sup>26,27</sup> and humans.<sup>28</sup> Noroxycodone is formed through N-demethylation by CYP3A4. It has a poor antinociceptive effect after intracerebroventricular injection in rats.<sup>20</sup> It has been suggested that at least part of the analgesia after oxycodone administration is mediated by active metabolites such as oxymorphone.<sup>29</sup>

The aim of the current project was to study the antino-

\* Ph.D. Student, # Professor, Department of Pharmacology, Institute of Biomedicine, University of Helsinki, Helsinki, Finland. Submitted for publication March 14, 2006. Accepted for publication June 6, 2006. Supported by a grant from the Finnish Association for the Study of Pain, Helsinki, Finland, and funds from the University of Helsinki, Helsinki, Finland. The authors do not have any financial or other relationships that might lead to a conflict of interest. Dr. Kalso has received an unrestricted grant for clinical research from Mundipharma Oy, Vantaa, Finland, and she has received honoraria from Mundipharma Oy, Vantaa, Finland; Janssen-Cilag Oy, Espoo, Finland; Pfizer Oy, Helsinki, Finland; and Astra Zeneca Oy, Espoo, Finland. Dr. Kontinen has received honoraria from Janssen-Cilag Oy, Espoo, Finland.

Received from the Department of Pharmacology, Institute of Biomedicine, University of Helsinki, Helsinki, Finland. Submitted for publication March 14, 2006. Accepted for publication June 6, 2006. Supported by a grant from the Finnish Association for the Study of Pain, Helsinki, Finland, and funds from the University of Helsinki, Helsinki, Finland. The authors do not have any financial or other relationships that might lead to a conflict of interest. Dr. Kalso has received an unrestricted grant for clinical research from Mundipharma Oy, Vantaa, Finland, and she has received honoraria from Mundipharma Oy, Vantaa, Finland; Janssen-Cilag Oy, Espoo, Finland; Pfizer Oy, Helsinki, Finland; and Astra Zeneca Oy, Espoo, Finland. Dr. Kontinen has received honoraria from Janssen-Cilag Oy, Espoo, Finland.

Address correspondence to Dr. Lemberg: Institute of Biomedicine/Pharmacology, P.O. Box 63, FIN-00014 University of Helsinki, Finland. kim.lemberg@helsinki.fi. Individual article reprints may be purchased through the Journal Web site, www.anesthesiology.org.

ciceptive properties of oxycodone and its metabolites oxymorphone and noroxycodone after different routes of administration using various nociceptive tests in rats. We were particularly interested to explore further the effectiveness of oxycodone after spinal administration. For this purpose, G-protein activation by oxycodone and oxymorphone was compared with morphine in an *in vitro* study using GTP $\gamma$ [ $^{35}\text{S}$ ] autoradiography in the spinal cord and brain sections from rats.

## Materials and Methods

### Animals

The research was conducted according to the guidelines of local authorities and the International Association for the Study of Pain.<sup>30</sup> The protocol of the study was approved by the institutional animal investigation committee University of Helsinki and the provincial government of Southern Finland (Uudenmaan lääninhallitus, Helsinki, Finland).

Male Sprague-Dawley rats ( $n = 56$ ; Harlan, Horst, Netherlands) weighing 175–200 g were used ( $n = 7$  or 8 in the behavioral studies and  $n = 5$  or 6 in the GTP $\gamma$ [ $^{35}\text{S}$ ] binding study). The animals were housed in clear plastic cages with a 12-h/12-h artificial light–dark cycle. Water and laboratory chow were available *ad libitum*. Before the nociceptive tests, the animals were habituated to the testing environment for 30 min/day for 3 days. A 3-day washout was used between the nociceptive tests. In the spontaneous motility test, habituation was not performed. After the tests, the animals were killed.

### Drugs

Oxycodone hydrochloride was purchased from the University Pharmacy (Helsinki, Finland); naloxone hydrochloride and naltrexone hydrochloride were purchased from RBI (Natick, MA); and nor-binaltorphimine hydrochloride and [d-Ala<sup>2</sup>, N-Me-Phe<sup>4</sup>, Gly<sup>5</sup>-ol]-enkephalin (DAMGO) were purchased from Tocris (Bristol, United Kingdom). Oxymorphone hydrochloride and noroxycodone hydrochloride were synthesized from oxycodone hydrochloride. All drugs were dissolved in saline and administered subcutaneously or intrathecally. Saline served as control. Naloxone and nor-binaltorphimine were administered 30 min before the testing.

### Synthesis of Noroxycodone Hydrochloride

Oxycodone (1.20 g, 3.81 mmol) was dissolved in acetic anhydride (15 ml). The reaction mixture was stirred at 100°C for 2 h, after which it was evaporated to dryness *in vacuo*. Saturated aqueous NaHCO<sub>3</sub> (20 ml) was added, and the mixture was extracted with CH<sub>2</sub>Cl<sub>2</sub> (3  $\times$  20 ml). The combined organic layers were washed with water (20 ml) and brine (20 ml), dried over MgSO<sub>4</sub>, and evaporated to afford 14-acetyloxycodone as a solid. The yield was 1.27 g (93%). The product had proton

nuclear magnetic resonance spectroscopy ( $^1\text{H}$  NMR) data identical to those reported before.<sup>31</sup>

At 0°C, 1-chloroethyl chloroformate (2.50 g, 17.5 mmol) was slowly added to a mixture of 14-acetyloxycodone (1.26 g, 3.53 mmol) and KHCO<sub>3</sub> (3.50 g, 35.0 mmol) in 1,2-dichloroethane (20 ml). The reaction mixture was refluxed for 25 h, allowed to cool, and filtered through a pad of Celite 545 (Aldrich, Steinheim, Germany). The filtrate was evaporated to give a brownish oil. Methanol (30 ml) was added, and the reaction mixture was refluxed for 1 h. The solvent was evaporated, and the resulting solids were dissolved in 6 M aqueous HCl (20 ml). The reaction mixture was stirred at 85°C for 42 h. Water was evaporated *in vacuo*, and saturated aqueous NaHCO<sub>3</sub> was added. The resulting mixture was extracted with CH<sub>2</sub>Cl<sub>2</sub> (4  $\times$  50 ml). The combined organic layers were washed with water (30 ml) and brine (30 ml), dried over MgSO<sub>4</sub>, and evaporated. The crude product was dissolved in methanol, and HCl (5 ml, 1.25 M in 2-propanol) was added. The solvents were evaporated, and the resulting crude hydrochloride was recrystallized from MeOH/Et<sub>2</sub>O to afford noroxycodone hydrochloride as a white solid. The yield was 350 mg (30% from oxycodone). The product had  $^1\text{H}$  NMR data identical to those reported.<sup>31</sup>

### Synthesis of Oxymorphone Hydrochloride

Boron tribromide (12 ml, 1 M in CH<sub>2</sub>Cl<sub>2</sub>) was added drop-wise under argon at 0°C to a solution of oxycodone (630 mg, 2.00 mmol) in CH<sub>2</sub>Cl<sub>2</sub> (10 ml). The reaction mixture was stirred for 1 h and poured into a mixture of ice and water (approximately 20 ml). The resulting mixture was made alkaline with concentrated aqueous NH<sub>4</sub>OH, and the layers were separated. The aqueous layer was extracted with CH<sub>2</sub>Cl<sub>2</sub> (8  $\times$  20 ml). The combined organic layers were dried over MgSO<sub>4</sub> and evaporated. The resulting yellowish solid was dissolved in aqueous HCl (approximately 1 M) and stirred for 1 h, and the solvent was evaporated. The resulting hydrochloride was recrystallized from ethanol/ethyl acetate to afford oxymorphone hydrochloride as a brownish solid (138 mg, 23%). The product had  $^1\text{H}$  NMR data identical to those reported.<sup>32,33</sup>

### Intrathecal Cannulation

Intrathecal cannulation was performed during anesthesia with 5.0 mg/kg subcutaneous midazolam (Midazolam Alparma; Alparma, Oslo, Norway) and 1.0 ml/kg Hypnorm® (0.2 mg/ml fentanyl and 10 mg/ml fluanisone; Janssen Pharmaceutica, Beerse, Belgium). A thin polyethylene cannula (Portex Ltd., Hythe, Kent, United Kingdom) was inserted through the cisterna magna to the lumbar subarachnoid space with the tip of the cannula at 8 cm from the insertion. The cannula was fixed with a suture to the paravertebral muscles.<sup>34</sup> The condition of the animals was checked after surgery, and the animals were housed indi-

vidually in clear plastic cages. Animals with any neurologic disturbances were immediately killed. Proper placement of the polyethylene cannula was verified with an intrathecal injection of 10  $\mu$ l lidocaine, 10 mg/ml (Lidocain<sup>®</sup>; Orion Pharma, Espoo, Finland), 5 days after cannulation. Only rats with reversible symmetrical paralysis of both hind limbs after injection were used in the experiments, which started 10 days after the cannulation.

### Nociceptive Tests

For the paw-pressure test, performed with a paw-pressure apparatus (Ugo Basile, Milan, Italy), the rats were gently wrapped in a towel. The left hind paw of the rat was placed under the weight of the apparatus, and the test was started. A brisk foot withdrawal of the hind leg after constantly increasing pressure terminated the measurement, and the pressure was recorded.

Hot-plate latencies were tested with a Harvard Apparatus Ltd. hot plate (Edenbridge, Kent, United Kingdom). In the test, the rats were kept inside a transparent plastic cage on a hot plate ( $52^\circ \pm 0.3^\circ\text{C}$ ). Licking or shaking the hind paw or jumping were considered as signs of thermal nociception. To avoid tissue damage, 60 s was set as the cutoff time. Tail-flick latencies were tested with a Ugo Basile (Comerio, Italy) apparatus. In the test, the rats were placed in transparent hard plastic tubes. The tests were repeated three times (with a 15-s interval) at every time point. The cutoff was set at 8 s to avoid tissue damage.

The results of the nociceptive tests where a cutoff value was used (tail-flick, hot-plate, and paw-pressure tests) are shown as mean of the maximum percentage effect (MPE%), calculated as [(post value – pre value)/(cutoff – pre value)]  $\times$  100%.

### Spontaneous Motor Activity

Possible sedative effects of the drugs were tested by measuring spontaneous motor activity. The rats were placed one at a time in a measurement box (70  $\times$  70  $\times$  35 cm) that was covered and isolated from sounds and light. Photocells were located at two different levels inside the box (2 and 12 cm) above its bottom. They automatically detected horizontal and vertical movements of the rat inside. A 30-min period of testing was undertaken 30 min after subcutaneous drug injection. Because there is usually very little motor activity 15–30 min after the animal has been placed in the box, the mean percentage of inhibition at 0–15 min after the drug administration was used for the dose-response analysis and calculated as

$$\% \text{inhibition} = \{ \text{mean} [\text{AUCsal}_{0-15} - (\text{AUCdrug}_{0-15})] / \text{mean}(\text{AUCsal}_{0-15}) \} \times 100\%,$$

where (AUCdrug<sub>0-15</sub>) is the area under the curve from 0 to 15 min after the drug administration, and mean (AUC-

sal<sub>0-15</sub>) is the average of the same AUC:s measured after the saline injections.

### GTP $\gamma$ [<sup>35</sup>S] Autoradiography

After decapitation, the brains and the lumbar spinal cords of the opioid-naïve rats were carefully dissected. Tissues were rinsed in ice-cold saline, frozen on dry ice, and stored at  $-80^\circ\text{C}$ . Brain and lumbar spinal cord sections (14  $\mu$ m thick) were cut in a cryostat (Leica CM3050 S; Leica Microsystems, Nussloch, Germany). After this, they were mounted on poly-L-lysine-coated slides that were kept desiccated at  $-80^\circ\text{C}$  until used. The GTP $\gamma$ [<sup>35</sup>S] autoradiography was conducted essentially as described before.<sup>35,36</sup> Briefly, sections were first preincubated with 0.95 ml of 50 mM Tris-HCl, 100 mM NaCl, 5 mM MgCl<sub>2</sub>, and 1 mM EDTA (pH 7.4) per slide for 20 min at  $20^\circ\text{C}$ , followed by a second preincubation (0.95 ml per slide for 60 min at  $20^\circ\text{C}$ ) with the same buffer with presence of 48 mM GDP and 24 mM DPCPX (Tocris). The final incubation (90 min at  $20^\circ\text{C}$ ) was performed using the buffer supplemented with 20 mM DTT, 48 mM GDP, 24 mM DPCPX, and 42 pM GTP $\gamma$ [<sup>35</sup>S] (PerkinElmer Inc., Boston, MA) supplemented with various concentrations of the ligands studied. Nonspecific binding was determined in the presence of 10  $\mu$ M unlabeled GTP $\gamma$ S. DAMGO, 10  $\mu$ M, represented as maximal binding, and non- $\mu$ -opioid receptor-mediated binding of the ligands studied were determined in the presence of 10  $\mu$ M nal-trexone. Slides were washed twice for 5 min in ice-cold washing buffer (50 mM Tris-HCl, pH 7.4, 5 mM MgCl<sub>2</sub>), followed by one 30-s rinse in distilled water at  $0^\circ\text{C}$  and drying under cool air. Slides were exposed to Kodak Bio Max MR film (Eastman Kodak, Rochester, NY). After 5 days of exposure together with <sup>14</sup>C-plastic standards (GE Healthcare, Buckinghamshire, United Kingdom), the films were developed using a Kodak GBX developer (Eastman Kodak) for 5 min, H<sub>2</sub>O rinse for 5 s, then fixed with a Kodak GBX fixer (Eastman Kodak) for 4 min at  $20^\circ\text{C}$ , and finally rinsed under cold running tap water. Films were further analyzed and quantified with Dage MTI-apparatus (DAGE-MTI Inc., Michigan City, IN) combined with MCID Elite M5+ version 4.0 (Imaging Research Inc., St. Catharines, Ontario, Canada). The binding densities in the studied central nervous system (CNS) regions were converted to nCi/g values with the help of the simultaneously exposed standards. Nonspecific binding was subtracted from all values. Finally, all values for the various ligands were expressed as percentages of the 10  $\mu$ M DAMGO-stimulated maximal values. All chemicals were purchased from Sigma-Aldrich (St. Louis, MO), if not otherwise stated.

### Statistical Analysis

Paired *t* test and nonparametric analyses of variance (the Kruskal-Wallis and Mann-Whitney tests), of Stat-View 5.5 (SAS Institute Inc., Cary, NC), with Bonferroni



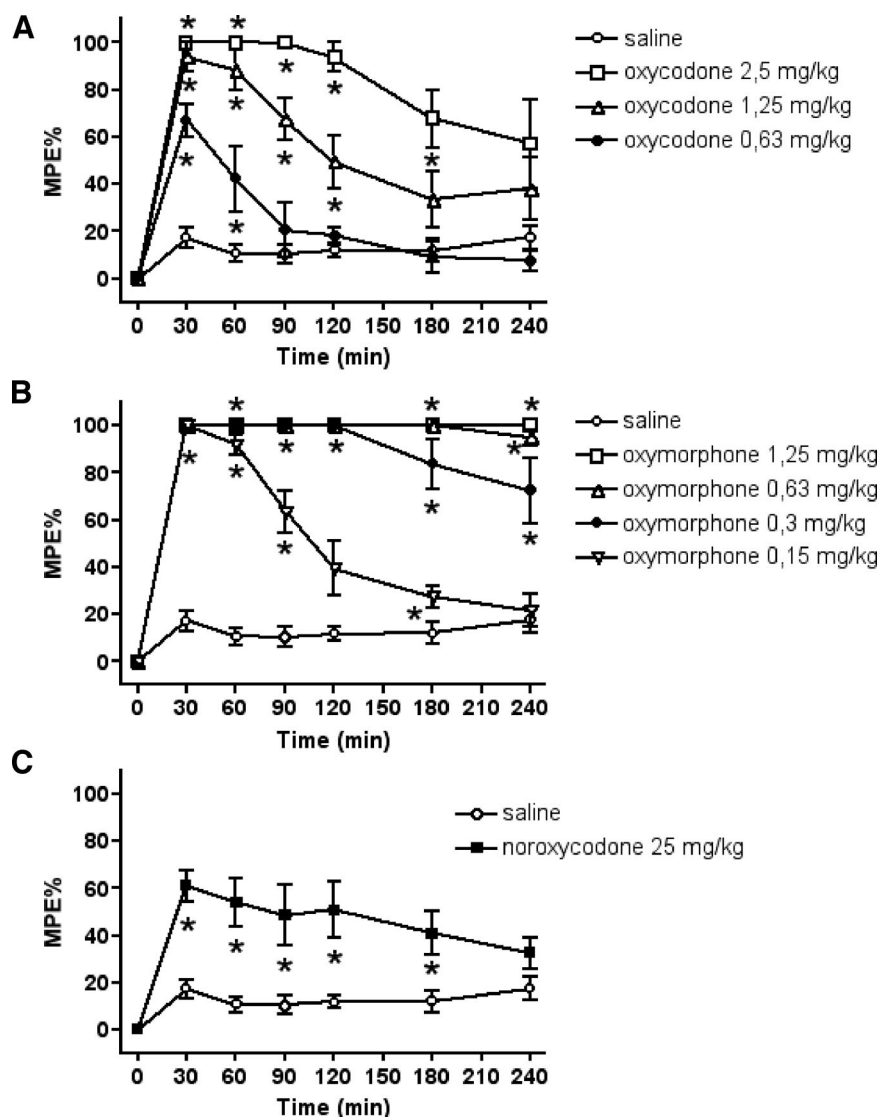

Fig. 1. Effects of subcutaneous administration of the drugs studied in the tail-flick test. Time course of the antinociceptive effect of oxycodone (A), oxymorphone (B), and noroxycodone (C) after subcutaneous administration in the tail-flick test. The mean of the maximum possible effect (MPE%)  $\pm$  SEM is plotted over time (in minutes). \* Statistically significant differences ( $P < 0.05$ ) as compared with the saline control.

correction for multiple comparisons, when appropriate, were used for the statistical analysis.

## Results

### *Antinociception and the Route of Drug Administration*

Saline injections had no significant effects on the pain thresholds in any of the tests. In the tail-flick test, subcutaneous oxycodone (fig. 1A) and oxymorphone (fig. 1B) produced dose-related antinociception (significantly different from the saline group) with a maximum effect 30 min after the injection. A 100% MPE was achieved with 2.5 mg/kg oxycodone and 0.15 mg/kg oxymorphone. Subcutaneous administration of 25 mg/kg noroxycodone (fig. 1C) caused a 60% MPE after 30 min of the drug administration (significantly different from the saline group).

In the hot-plate test, a subcutaneous injection of oxycodone (fig. 2A) did not induce a 100% MPE, and the

effect of 76% MPE was reached 30 min after the administration of 2.5 mg/kg oxycodone (significantly different from the saline group). Subcutaneous injection of oxymorphone (fig. 2B) produced clear dose-related antinociception with a maximum effect 30 min after the injection (significantly different from the saline group). A 100% MPE was achieved with 0.63 mg/kg oxymorphone. Subcutaneous administration of 25 mg/kg noroxycodone (fig. 2C) caused a 13% MPE.

In the paw-pressure test, a subcutaneous injection of 2.5 mg/kg oxycodone (fig. 3A) induced statistically significant dose-related antinociception, and a 73% MPE was reached 30 min after the administration. Subcutaneous injection of oxymorphone (fig. 3B) produced clear dose-related antinociception (significantly different from the saline group) with a maximum effect 30 min after the injection. A 100% MPE was achieved with 0.63 mg/kg oxymorphone. Subcutaneous administration of 25 mg/kg noroxycodone (fig. 3C) caused a 22% MPE 60 min after the injection.

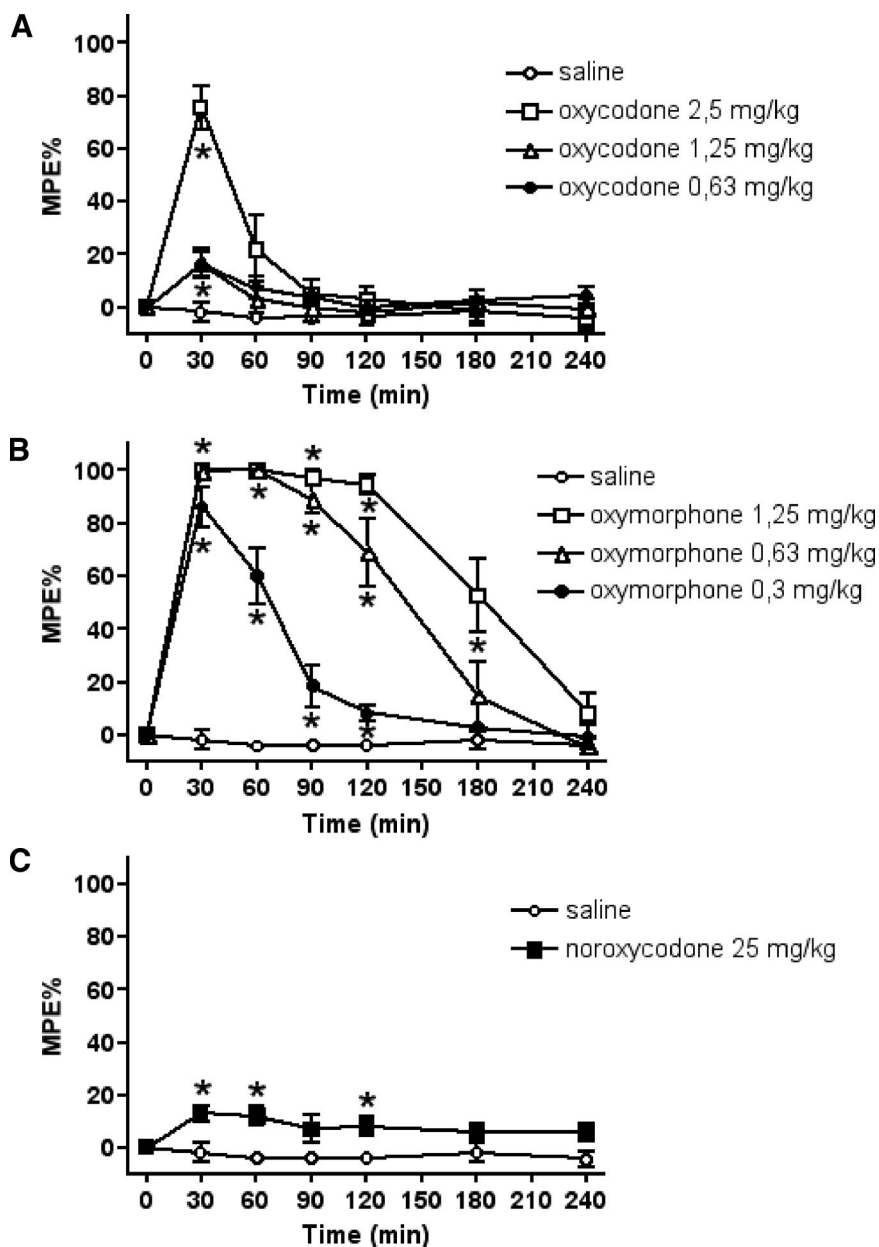

Fig. 2. Effects of subcutaneous administration of the drugs studied in the hot-plate test. Time course of the antinociceptive effect of oxycodone (A), oxymorphone (B), and noroxycodone (C) after subcutaneous administration in the hot-plate test. The mean of the maximum possible effect (MPE%)  $\pm$  SEM is plotted over time (in minutes). \* Statistically significant differences ( $P < 0.05$ ) as compared with the saline control.

Intrathecal administration of oxycodone (fig. 4A), oxymorphone (fig. 4B), and noroxycodone (fig. 4C) produced dose-related antinociception that was significantly different from that of the saline group. The duration of oxycodone-induced antinociception was markedly shorter compared with that induced by oxymorphone and noroxycodone. A 100% MPE was achieved with an intrathecal injection of 1.25  $\mu$ g oxymorphone.

#### Effects of $\mu$ - and $\kappa$ -Opioid Receptor Antagonists

In the hot-plate test, subcutaneous administration of the selective  $\kappa$ -opioid receptor antagonist nor-binaltorphimine (10 mg/kg) with oxycodone or oxymorphone 30 min before the testing did not significantly reduce hot-plate latencies (fig. 5). Antinociception by oxy-

codone or oxymorphone was completely antagonized with coadministration of 1 mg/kg subcutaneous naloxone 30 min before the testing.

The MPE% of the tail-flick latency after 200  $\mu$ g intrathecal oxycodone was significantly reduced from 96% to 15% after administration of 1 mg/kg subcutaneous naloxone 30 min before testing (fig. 6).

#### Spontaneous Locomotor Activity

The locomotor activity was dose-dependently decreased after subcutaneous injections of oxycodone and oxymorphone 30 min before the measurements (figs. 7A and B). A statistically significant reduction of spontaneous locomotor activity compared with the saline control group was observed during the first 10 min of the 30-min period of measurement, when most of the exploratory activity takes place. Subcutane-

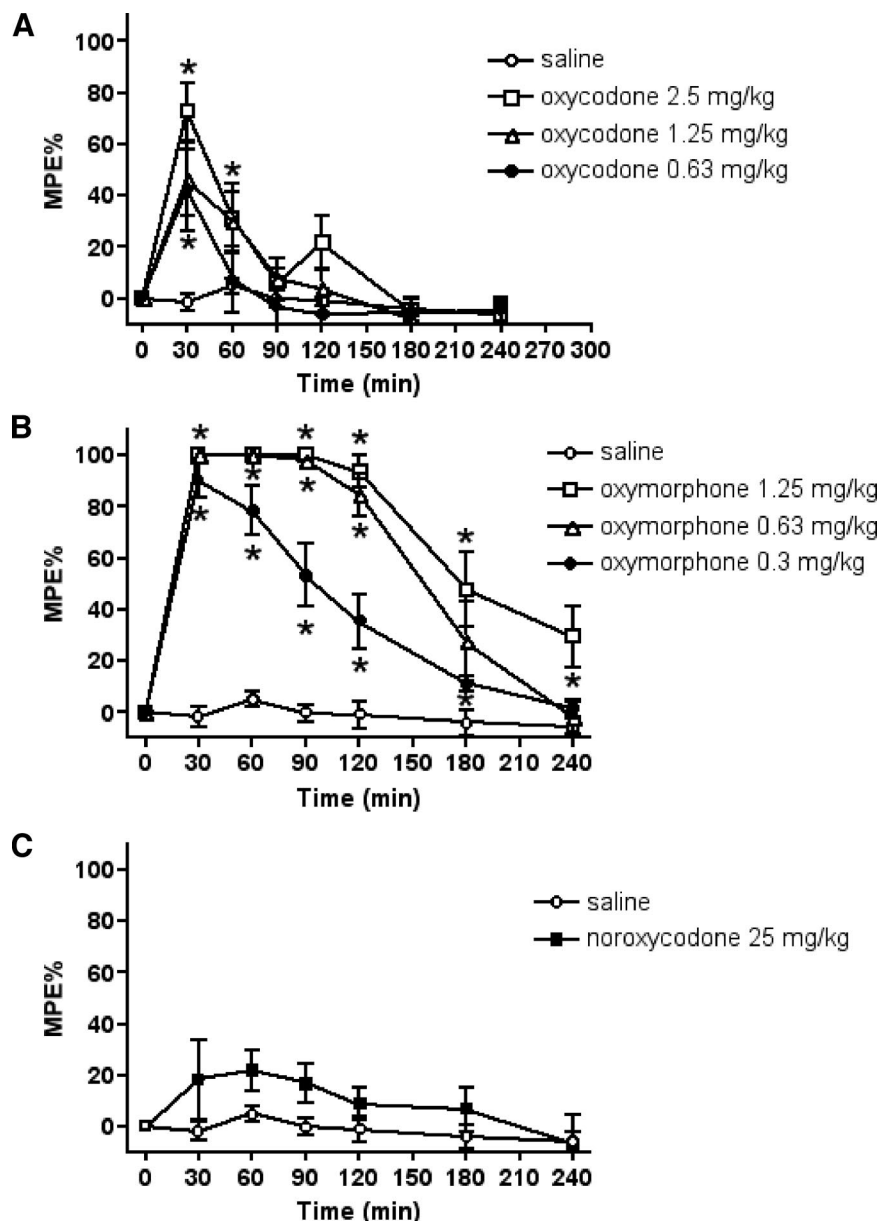

Fig. 3. Effects of subcutaneous administration of the drugs studied in the paw-pressure test. Time course of the antinociceptive effect of oxycodone (A), oxymorphone (B), and noroxycodone (C) after subcutaneous administration in the paw-pressure test. The mean of the maximum possible effect (MPE%)  $\pm$  SEM is plotted over time (in minutes). \* Statistically significant differences ( $P < 0.05$ ) as compared with the saline control.

ous administration of 25 mg/kg noroxycodone had no statistically significant sedative effect compared with the saline control.

#### Opioid Receptor Signaling

$\mu$ -Opioid receptor-mediated G-protein activation was differentially observed in all studied rat brain regions and in the dorsal horn of the spinal cord with all study drugs, and it was absent in the presence of 10  $\mu$ M naltrexone. There were also regional differences in the basal GTP $\gamma$ [ $^{35}$ S] binding: The amygdala, periaqueductal gray (PAG), and dorsal horn of the spinal cord showed increased levels of basal GTP $\gamma$ [ $^{35}$ S] binding compared with the frontal cortex, thalamus, and striatum (figs. 8–10).

DAMGO-stimulated (10  $\mu$ M) GTP $\gamma$ [ $^{35}$ S] binding was high in the striatum, amygdala, and dorsal horn of the spinal cord (fig. 8 and autoradiographs in figs. 10B, D, and F). Moderate stimulation of the GTP $\gamma$ [ $^{35}$ S] binding

was observed in the thalamus and PAG (fig. 8 and autoradiographs in figs. 10C and E). Low stimulation was found in the frontal cortex (fig. 8 and autoradiograph in fig. 10A). In the spinal cord,  $\mu$ -opioid receptor-mediated G-protein activation was mainly located in the most superficial layers of the dorsal horn (fig. 10F). The maximal G-protein activation in the spinal cord induced by oxycodone was lower than that induced by oxymorphone and morphine (fig. 9F). The weakest effect of oxycodone compared with morphine and oxymorphone was observed in the PAG and the spinal cord (fig. 9E, F).

Oxymorphone was the most potent of the drugs in all of the CNS regions studied. All drugs studied were apparently partial agonists. Oxymorphone was in all regions as efficacious as morphine, but it needed approximately 10- to 100-fold lower concentrations than oxycodone. The frontal cortex showed the lowest 10  $\mu$ M

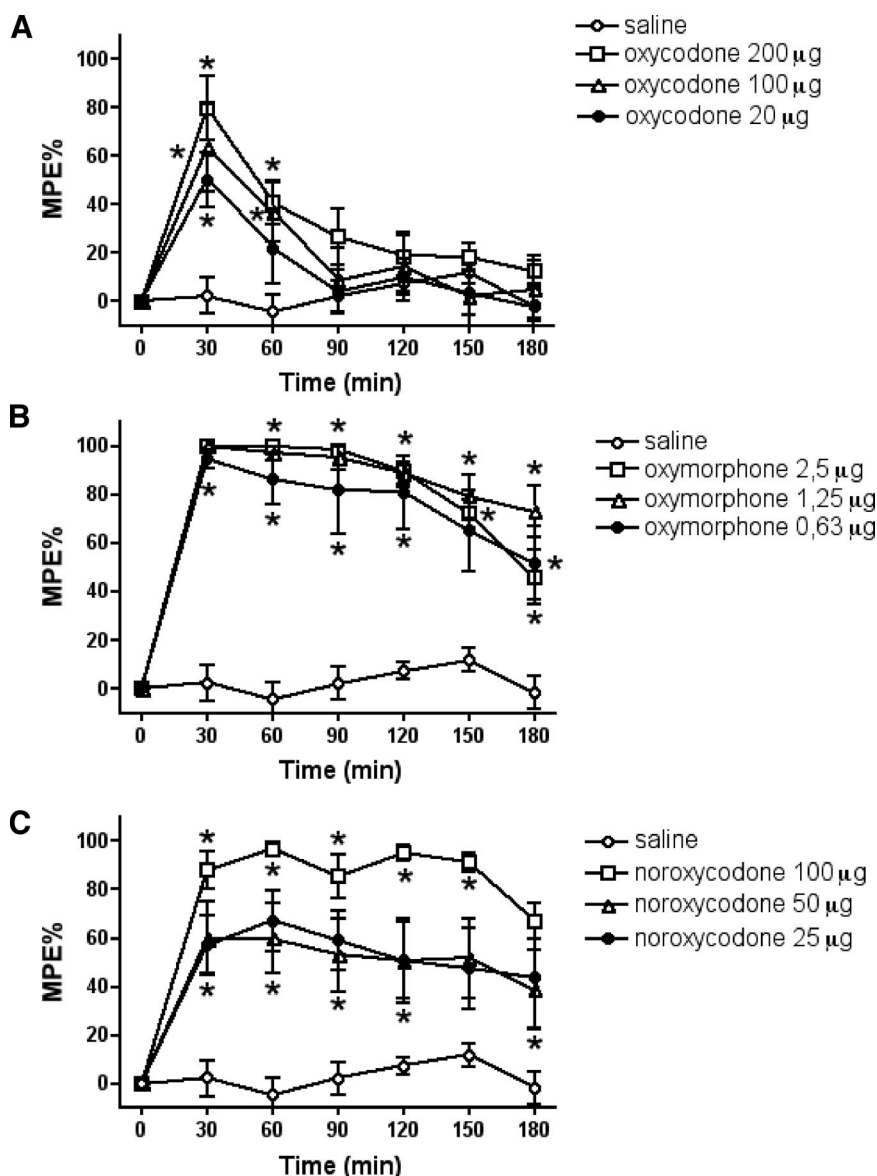

Fig. 4. Effect of intrathecal administration of the drugs studied in the tail-flick test. Time course of the antinociceptive effect of oxycodone (A), oxymorphone (B), and noroxycodone (C) after intrathecal administration in the tail-flick test. The mean of the maximum possible effect (MPE%)  $\pm$  SEM is plotted over time (in minutes). \* Statistically significant differences ( $P < 0.05$ ) as compared with the saline control.

DAMGO-stimulated GTP $\gamma$ [ $^{35}$ S] binding in the studied CNS regions (fig. 8), whereas oxymorphone caused the strongest G-protein activation compared with oxycodone and morphine in this region (fig. 9A). Morphine-stimulated maximal GTP $\gamma$ [ $^{35}$ S] binding was considerably higher in the striatum (fig. 9B) and in the amygdala (fig. 9D) compared with other studied CNS regions.

In the thalamus (fig. 9C), the study drugs caused comparable maximal GTP $\gamma$ [ $^{35}$ S] activation.

## Discussion

The intrathecal as compared with systemic pharmacologic effects of oxycodone, oxymorphone, and morphine were studied, and GTP $\gamma$ [ $^{35}$ S] autoradiography<sup>35-37</sup> was used to visualize the agonist-stimulated G-protein activation in the rat brain and spinal cord sections. Previous pharmacologic studies have shown that  $\mu$ -opioid

receptor agonists have differences in their ability to activate intracellular G proteins in the CNS.<sup>38-40</sup> The fact that the function of the  $\mu$ -opioid receptor system has regional specificity<sup>41,42</sup> offers new possibilities for the study of pharmacodynamic differences between various opioids.

In the current study, the regional differences in the basal GTP $\gamma$ [ $^{35}$ S] binding indicate high basal GTP $\gamma$ [ $^{35}$ S] binding in amygdala, which is in agreement with previous studies.<sup>42</sup> PAG and dorsal horn of the spinal cord also showed high levels of basal GTP $\gamma$ [ $^{35}$ S] binding compared with the frontal cortex, thalamus, and striatum.

In the GTP $\gamma$ [ $^{35}$ S] binding assay, oxycodone had reduced ability (lower efficacy and potency) to activate G proteins, particularly in the dorsal horn of the spinal cord and PAG, compared with other study drugs. PAG and the descending inhibitory tracts play a crucial role in the modulation of nociception in the spinal cord. This



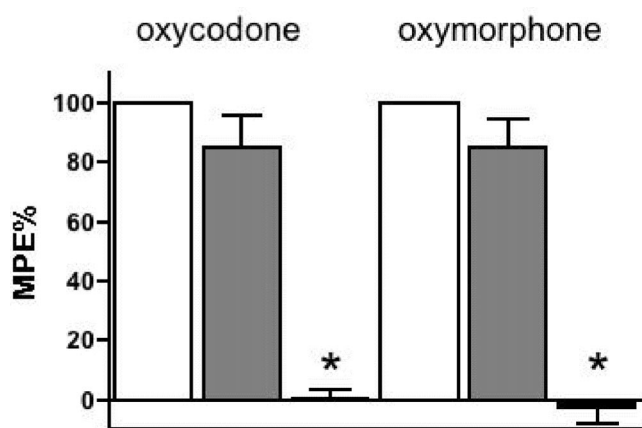

Fig. 5. Antagonist effect of subcutaneous naloxone or nor-binaltorphimine against oxycodone or oxymorphone-induced antinociception in the hot-plate test. Antagonist effect of subcutaneous naloxone (1 mg/kg; black bars) and nor-binaltorphimine (10 mg/kg; gray bars) versus saline (white bars), administered with subcutaneous oxycodone (2.5 mg/kg) or oxymorphone (0.3 mg/kg) 30 min before testing. The hot-plate latencies are shown as the mean of the maximum possible effect (MPE%)  $\pm$  SEM at 30 min after drug administration. \* Statistically significant difference ( $P < 0.05$ ) as compared with the saline control.

study is the first to show that the weak antinociceptive effect of oxycodone after spinal administration in rats may result from its weak ability to induce G-protein activation in the dorsal horn of the spinal cord and the PAG. Oxycodone is a weak  $\mu$ -opioid receptor agonist, being approximately 10-fold less effective than morphine in the GTP $\gamma$ [ $^{35}$ S] binding assay<sup>38</sup> in the rat thalamus. Also, the binding affinity of oxycodone to the  $\mu$ -opioid receptor is significantly lower than that of morphine in the rat brain homogenate.<sup>12</sup> These results disagree with the *in vivo* findings of the potencies of systemic oxycodone and morphine. Pöyhä and Kalso<sup>19</sup> reported that subcutaneously and intraperitoneally administered oxycodone is two to four times more potent than morphine in rats. This discrepancy suggests that active metabolites may increase the antinociceptive effects of systemic oxycodone.

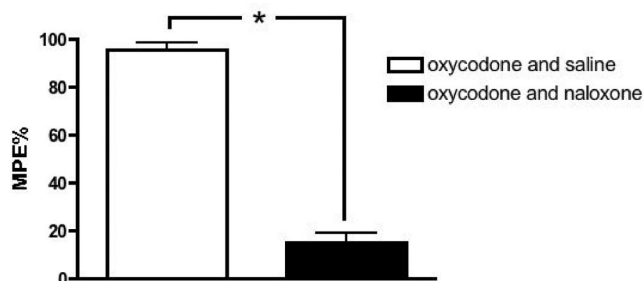

Fig. 6. Antagonist effect of subcutaneous naloxone against intrathecal oxycodone-induced antinociception in the tail-flick test. The antinociceptive effect, expressed as the mean of the maximum possible effect (MPE%)  $\pm$  SEM, of intrathecal oxycodone (200  $\mu$ g) in the tail-flick test is shown 30 min after administration of subcutaneous naloxone (1 mg/kg) or saline. \* Statistically significant differences ( $P < 0.05$ ) between the study groups.

According to Thompson *et al.*,<sup>38</sup> O-demethylation of oxycodone to oxymorphone produces a 30- to 40-fold increase in the potency to stimulate  $\mu$ -opioid receptor-mediated GTP $\gamma$ [ $^{35}$ S] binding in the rat thalamus and human  $\mu$ -opioid receptors (hMOR-CHO cells). This is in agreement with the results of the current study, where oxymorphone showed approximately 10- to 100-fold greater potency than oxycodone to activate intracellular G proteins in all CNS regions studied.

The *in vivo* findings of the current study and previous reports indicate that oxycodone is a potent antinociceptive agent after systemic administration, but it produces only weak antinociception when administered intrathecally<sup>18,19</sup> or intracerebroventricularly.<sup>43</sup> In the current study, intrathecal administration of oxycodone produced significantly weaker antinociception compared with oxymorphone and noroxycodone. Even the highest dose of 200  $\mu$ g intrathecal oxycodone did not produce a 100% MPE in the tail-flick test, whereas this was achieved with only 2.5  $\mu$ g intrathecal oxymorphone. The poor efficacy and potency of oxycodone after intrathecal administration is not sex or strain specific, as it has been shown in both female Wistar and male Sprague-Dawley rats.<sup>18,19</sup>

Poor intrathecal efficacy of opioids has been explained by high lipophilicity.<sup>18</sup> However, intrathecally administered morphine induces significantly greater antinociception than oxycodone,<sup>18,19</sup> even though the lipophilicity of oxycodone is similar to that of morphine,<sup>3,18</sup> indicating that lipophilicity may not be a major factor. Therefore, the most likely explanation to the weak antinociceptive effect of intrathecal oxycodone would be that oxymorphone or some other active metabolite is not formed in the CNS after direct administration of oxycodone into the CNS.

Oxymorphone induced potent antinociception after both systemic and intrathecal administration in both thermal and mechanical tests of nociception. Previously, oxymorphone-induced antinociception has been shown in both rodents<sup>26,27</sup> and humans.<sup>28</sup> The role of oxymorphone as an active metabolite in oxycodone-induced analgesia has been questioned because the serum concentrations of oxymorphone have been extremely low after oral, intravenous, or intramuscular administration of oxycodone in humans.<sup>1,14,44</sup> In humans, blocking CYP 2D6, the isoenzyme catalyzing the conversion of oxycodone to oxymorphone, with quinidine (CYP 2D6 inhibitor) converted the metabolic pathway from O-demethylation (oxymorphone) to N-demethylation (noroxycodone). However, the pharmacodynamics of oxycodone were not altered.<sup>45</sup> These findings support the idea that the analgesic effect of oxycodone in humans would mainly result from its own analgesic activity,<sup>44</sup> or it could be a cooperative effect with some downstream active metabolite, *e.g.*, noroxymorphone.<sup>46</sup> In rabbits, oxymorphone was found in the urine mainly



Fig. 7. Drug effects on spontaneous motor activity. The effects of oxycodone, oxymorphone, and noroxycodone on spontaneous locomotion are shown 30 min after subcutaneous drug administration. (A) Time courses of the locomotor activity with example doses. The activity counts (number of photocell crossings in 5-min periods) over time ( $\pm$  SEM) are shown. (B) The dose-response curves for oxycodone, oxymorphone, and noroxycodone plotting mean percentage of inhibition of activity, as compared with the locomotor activity in the saline control group ( $\pm$  SEM) of 0–15 min period. \* Statistically significant difference ( $P < 0.05$ ) compared with the saline control group.

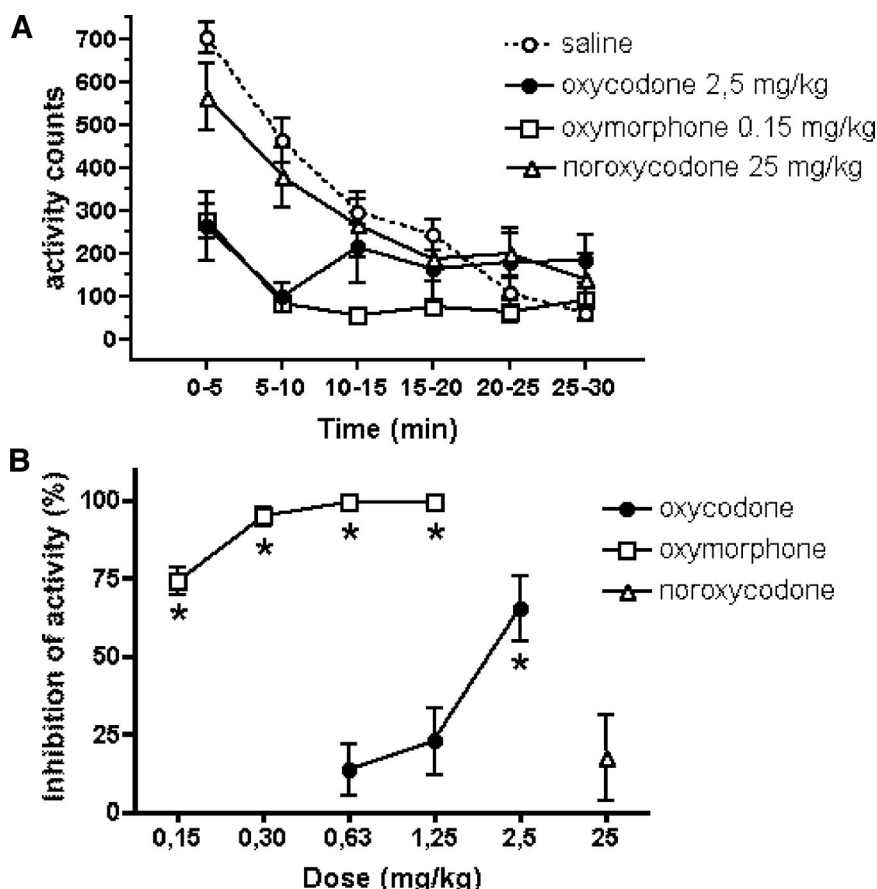

in the conjugated forms after subcutaneous administration.<sup>23</sup> It is not known whether the conjugated oxymorphone has antinociceptive effects.

Noroxycodone has been found in relatively large amounts in human serum after intramuscular and oral administration of oxycodone.<sup>1,44</sup> The antinociceptive activity of noroxycodone after intracerebroventricular administration has been reported to be low in rats.<sup>20</sup> In the current study, in all tested models of nociception subcutaneous administration of noroxycodone produced antinociception only after a high dose of 25 mg/kg, indi-

cating that it has no role in oxycodone-induced analgesia after systemic administration. Spinal administration of noroxycodone, however, produced a longer-lasting antinociceptive effect compared with oxycodone but only after relatively high doses (100  $\mu$ g). Noroxycodone was previously studied in the GTP $\gamma$ [<sup>35</sup>S] binding assay, and it was not significantly different in potency compared with oxycodone in rat thalamus.<sup>38</sup> Noroxycodone was therefore not used in the GTP $\gamma$ [<sup>35</sup>S] binding assay in the current study.

It has been suggested that oxycodone has  $\kappa$ -opioid receptor-mediated activity when administered intracerebroventricularly.<sup>43</sup> In the current study, the antinociceptive effects of subcutaneous oxycodone and oxymorphone were antagonized by subcutaneous administration of naloxone, showing the opioid system-mediated analgesic effect. However, the antinociceptive effects were not antagonized by the selective  $\kappa$ -antagonist nor-binaltorphimine. This would indicate that antinociception by both oxycodone and oxymorphone is mediated by the  $\mu$ - rather than the  $\kappa$ -opioid receptor. The weak and short antinociceptive effect of intrathecal oxycodone was also reversed by subcutaneous naloxone. Our findings are in agreement with previous studies<sup>13</sup> showing that oxycodone acts as a  $\mu$ -opioid receptor agonist in mice and binds selectively to the  $\mu$ -opioid receptor.<sup>11</sup>

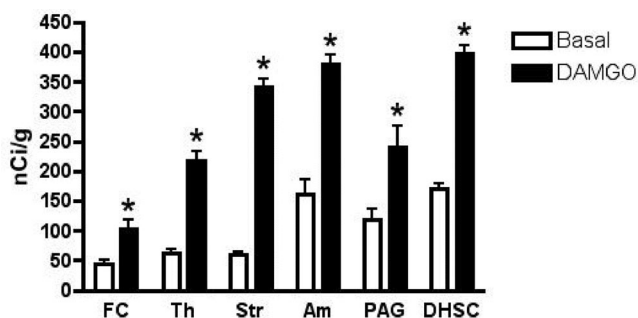

Fig. 8. Regional comparison of the basal and 10  $\mu$ M DAMGO-stimulated GTP $\gamma$ [<sup>35</sup>S] binding in studied brain regions and in the dorsal horn of the spinal cord. Data are expressed as mean ( $\pm$  SEM) in nCi/g. \* Statistically significant difference ( $P < 0.05$ ) as compared with the basal GTP $\gamma$ [<sup>35</sup>S] binding. Am = amygdala; DHSC = dorsal horn of the spinal cord; FC = frontal cortex; PAG = periaqueductal gray; Str = striatum; Th = thalamus.

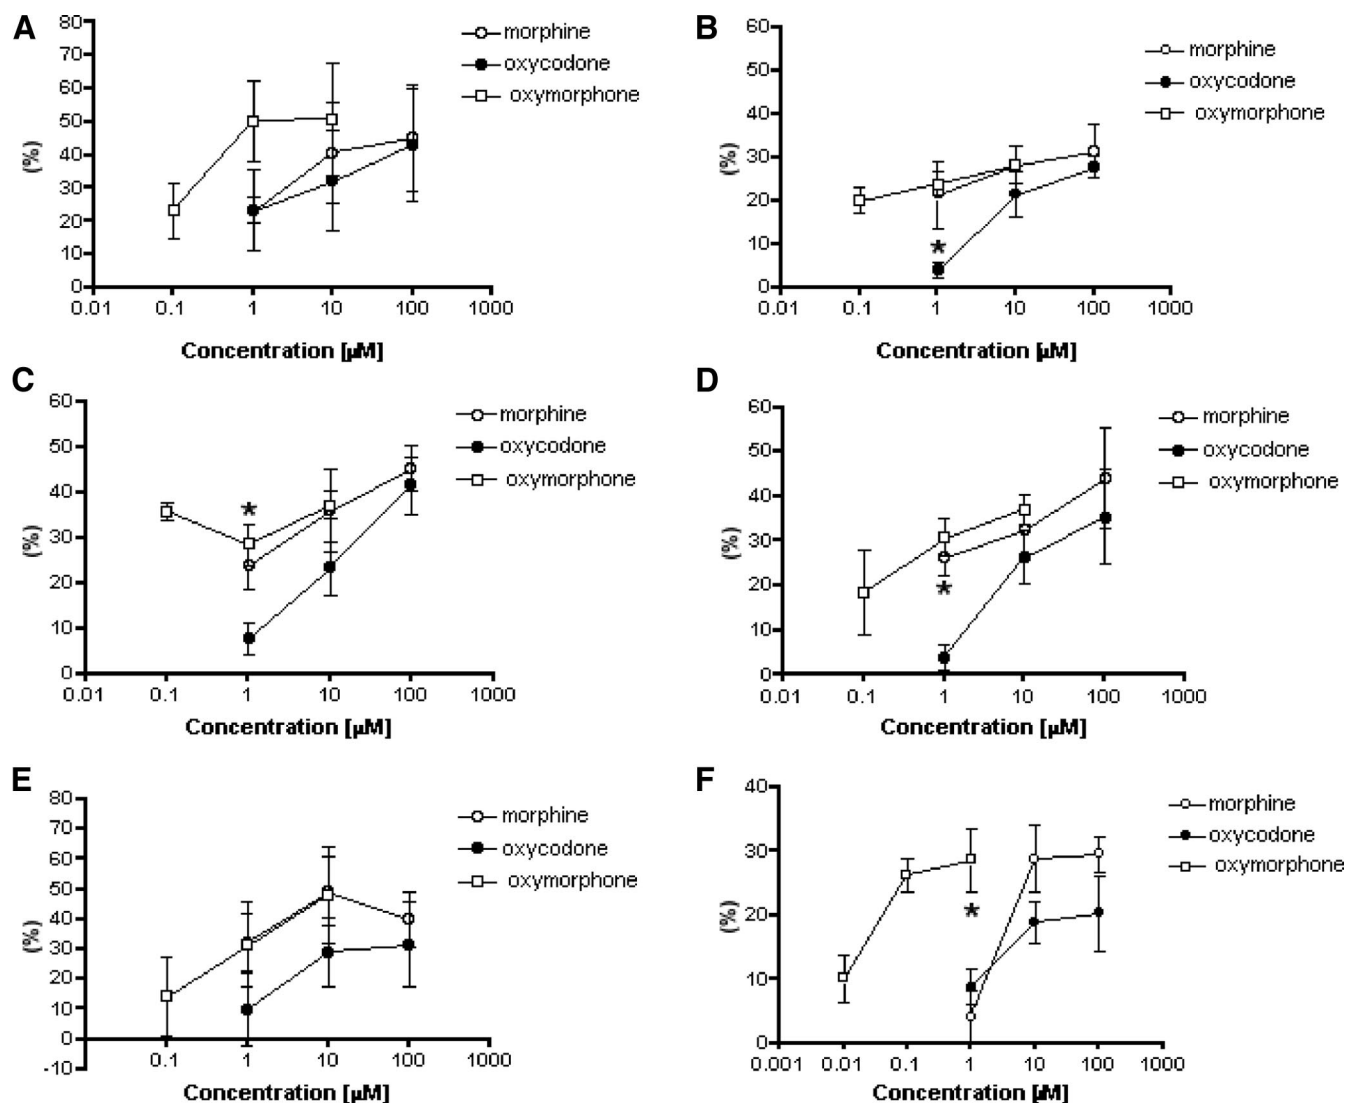

Fig. 9. G-protein activation by the opioid drugs. Dose-response curves for agonist-stimulated GTP $\gamma$ [ $^{35}$ S] binding in the rat frontal cortex (A), striatum (B), thalamus (C), amygdala (D), periaqueductal gray (E), and dorsal horn of the spinal cord (F). The autoradiograph illustrates an example of 10  $\mu$ M DAMGO-stimulated GTP $\gamma$ [ $^{35}$ S] binding (darkest areas indicating highest activity of G-protein activation). The mean ( $\pm$  SEM) of the percentage of maximal stimulation by 10  $\mu$ M DAMGO is shown for each concentration of the study drugs. \* Statistically significant difference ( $P < 0.05$ ) between the study drugs.

There was a dose-related, statistically significant reduction in the spontaneous locomotor activity after subcutaneous injections of oxycodone and oxymorphone, whereas noroxycodone was ineffective even after a relatively high dose. Previously, we have demonstrated that measurement of spontaneous locomotion is very sensitive to the sedative effects of centrally acting drugs.<sup>47</sup> Sedation is a major adverse effect of opioids, and it may interfere with the nociceptive tests, particularly when higher doses are used.

## Conclusions

Oxycodone is a potent analgesic after subcutaneous administration, but its analgesic potency is poor after intrathecal administration. Our current results suggest

that the poor spinal antinociceptive effect of intrathecal oxycodone relates to its low activity to induce intracellular G-protein activation in the spinal cord in rats.

Oxymorphone had the highest relative potency of the drugs studied after subcutaneous and intrathecal administrations. Noroxycodone was more potent than oxycodone after intrathecal administration but did not induce potent antinociception after subcutaneous administration, possibly indicating a high rate of metabolism after systemic administration or limited transport to the CNS.

The role of oxymorphone in oxycodone analgesia after systemic administration in man remains unclear. However, oxymorphone should be an interesting opioid for spinal administration.

It remains to be seen whether some of the discrepancies of the results regarding the antinociceptive actions

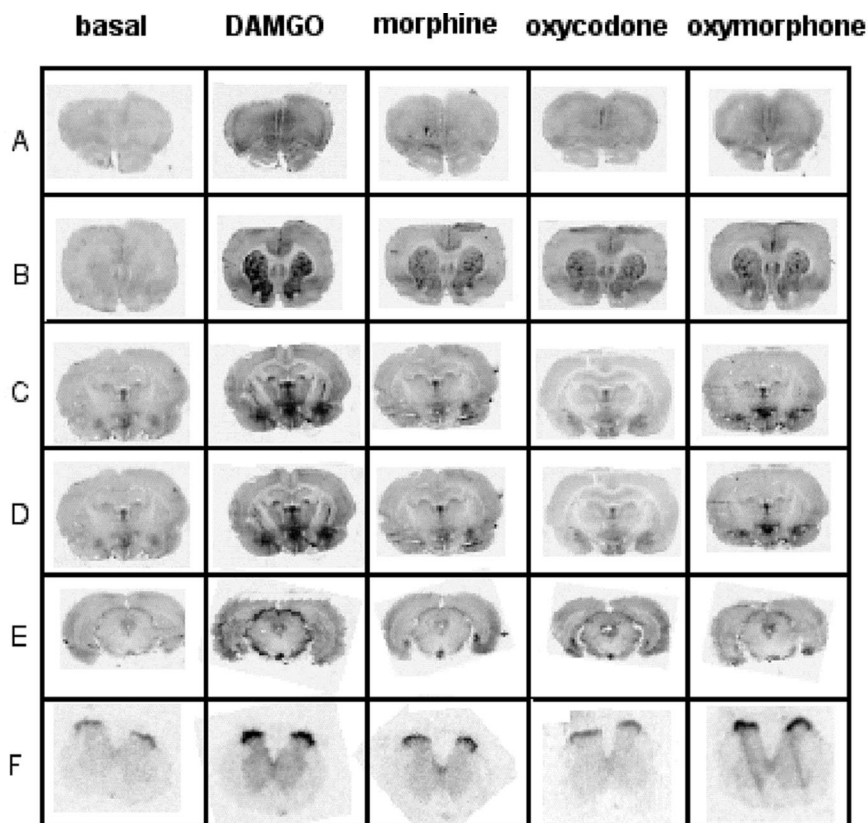

**Fig. 10.** Maximal agonist-stimulated GTP $\gamma$ [ $^{35}$ S] binding by the opioid drugs. Representative autoradiograms illustrating the maximal basal and agonist-stimulated GTP $\gamma$ [ $^{35}$ S] binding in the rat brain and spinal cord sections: frontal cortex (A), striatum (B), thalamus (C), amygdala (D), periaqueductal gray (E), and dorsal horn of the spinal cord (F).

of oxycodone in rats and human beings can be explained by differences of the metabolic pathways between rats and humans, and whether the key to understanding oxycodone-induced analgesia lies in the complex pharmacology of the G-protein receptors in the CNS.

The authors thank Aira Säisä (Technician, Institute of Biomedicine, Pharmacology, University of Helsinki, Helsinki, Finland) for excellent assistance in the GTP $\gamma$ [ $^{35}$ S] binding study.

## References

- Poyhia R, Seppala T, Olkkola KT, Kalso E: The pharmacokinetics and metabolism of oxycodone after intramuscular and oral administration to healthy subjects. *Br J Clin Pharmacol* 1992; 33:617-21
- Osborne R, Joel S, Trew D, Slevin M: Morphine and metabolite behavior after different routes of morphine administration: Demonstration of the importance of the active metabolite morphine-6-glucuronide. *Clin Pharmacol Ther* 1990; 47:12-9
- Poyhia R, Seppala T: Liposolubility and protein binding of oxycodone *in vitro*. *Pharmacol Toxicol* 1994; 74:23-7
- Chen Y, Mestek A, Liu J, Hurley JA, Yu L: Molecular cloning and functional expression of a mu-opioid receptor from rat brain. *Mol Pharmacol* 1993; 44:8-12
- Chen Y, Mestek A, Liu J, Yu L: Molecular cloning of a rat kappa opioid receptor reveals sequence similarities to the mu and delta opioid receptors. *Biochem J* 1993; 295:625-8
- Kieffer BL, Befort K, Gaveriaux-Ruff C, Hirth CG: The delta-opioid receptor: Isolation of a cDNA by expression cloning and pharmacological characterization. *Proc Natl Acad Sci U S A* 1992; 89:12048-52
- Yasuda K, Raynor K, Kong H, Breder CD, Takeda J, Reisine T, Bell GI: Cloning and functional comparison of kappa and delta opioid receptors from mouse brain. *Proc Natl Acad Sci U S A* 1993; 90:6736-40
- Evans CJ, Keith DE, Jr., Morrison H, Magendzo K, Edwards RH: Cloning of a delta opioid receptor by functional expression. *Science* 1992; 258:1952-5
- Henderson G, McKnight AT: The orphan opioid receptor and its endogenous ligand-nociceptin/orphanin FQ. *Trends Pharmacol Sci* 1997; 18:293-300
- Meunier JC, Mollereau C, Toll L, Suaudeau C, Moisand C, Alvinerie P, Butour JL, Guillemot JC, Ferrara P, Monsarrat B: Isolation and structure of the

endogenous agonist of opioid receptor-like ORL1 receptor. *Nature* 1995; 377:532-5

11. Monory K, Greiner E, Sartania N, Sallai L, Pouille Y, Schmidhammer H, Hanoune J, Borsodi A: Opioid binding profiles of new hydrazone, oxime, carbazone and semicarbazone derivatives of 14-alkoxymorphinans. *Life Sci* 1999; 64:2011-20

12. Chen ZR, Irvine RJ, Somogyi AA, Bochner F: Mu receptor binding of some commonly used opioids and their metabolites. *Life Sci* 1991; 48:2165-71

13. Beardsley PM, Aceto MD, Cook CD, Bowman ER, Newman JL, Harris LS: Discriminative stimulus, reinforcing, physical dependence, and antinociceptive effects of oxycodone in mice, rats, and rhesus monkeys. *Exp Clin Psychopharmacol* 2004; 12:163-72

14. Poyhia R, Olkkola KT, Seppala T, Kalso E: The pharmacokinetics of oxycodone after intravenous injection in adults. *Br J Clin Pharmacol* 1991; 32:516-8

15. Kalso E, Poyhia R, Onnela P, Linko K, Tigerstedt I, Tammisto T: Intravenous morphine and oxycodone for pain after abdominal surgery. *Acta Anaesthesiol Scand* 1991; 35:642-6

16. Backlund M, Lindgren L, Kajimoto Y, Rosenberg PH: Comparison of epidural morphine and oxycodone for pain after abdominal surgery. *J Clin Anesth* 1997; 9:30-5

17. Yanagitate F, Dohi S: Epidural oxycodone or morphine following gynaecological surgery. *Br J Anaesth* 2004; 93:362-7

18. Plummer JL, Cmielewski PL, Reynolds GD, Gourlay GK, Cherry DA: Influence of polarity on dose-response relationships of intrathecal opioids in rats. *Pain* 1990; 40:339-47

19. Poyhia R, Kalso EA: Antinociceptive effects and central nervous system depression caused by oxycodone and morphine in rats. *Pharmacol Toxicol* 1992; 70:125-30

20. Leow KP, Smith MT: The antinociceptive potencies of oxycodone, noroxycodone and morphine after intracerebroventricular administration to rats. *Life Sci* 1994; 54:1229-36

21. Cone EJ, Darwin WD, Buchwald WF, Gorodetzky CW: Oxymorphone metabolism and urinary excretion in human, rat, guinea pig, rabbit, and dog. *Drug Metab Dispos* 1983; 11:446-50

22. Ishida T, Oguri K, Yoshimura H: Determination of oxycodone metabolites in urines and feces of several mammalian species. *J Pharm Dyn* 1982; 5:521-5

23. Ishida T, Oguri K, Yoshimura H: Isolation and identification of urinary metabolites of oxycodone in rabbits. *Drug Metab Dispos* 1979; 7:162-5

24. Ishida T, Oguri K, Yoshimura H: A novel metabolite of oxycodone in the urine of rabbits. *J Pharm Dyn* 1982; 5:134-6



25. Weinstein SH, Gaylord JC: Determination of oxycodone in plasma and identification of a major metabolite. *J Pharm Sci* 1979; 68:527-8
26. Briggs SL, Sawyer DC, Rech RH, Galligan JJ: Oxymorphone-induced analgesia and colonic motility measured in colorectal distension. *Pharmacol Biochem Behav* 1995; 52:561-3
27. Bolan EA, Tallarida RJ, Pasternak GW: Synergy between mu opioid ligands: Evidence for functional interactions among mu opioid receptor subtypes. *J Pharmacol Exp Ther* 2002; 303:557-62
28. Beaver WT, Feise GA: A comparison of the analgesic effect of oxymorphone by rectal suppository and intramuscular injection in patients with post-operative pain. *J Clin Pharmacol* 1977; 17:276-91
29. Kalso E, Vainio A, Mattila MJ, Rosenberg PH, Seppala T: Morphine and oxycodone in the management of cancer pain: Plasma levels determined by chemical and radioreceptor assays. *Pharmacol Toxicol* 1990; 67:322-8
30. Zimmermann M: Ethical guidelines for investigations of experimental pain in conscious animals. *Pain* 1983; 16:109-10
31. Cheng CY, Hsin LW, Lin YP, Tao PL, Jong TT: *N*-cubylmethyl substituted morphinoids as novel narcotic antagonists. *Bioorg Med Chem* 1996; 4:73-80
32. Iijima I, Minamikawa J, Jacobson AE, Brossi A, Rice KC: Studies in the (+)-morphinan series: 5. Synthesis and biological properties of (+)-naloxone. *J Med Chem* 1978; 21:398-400
33. Coop A, Janetka JW, Lewis JW, Rice KC: L-Selectride as a general reagent for the O-demethylation and N-decarbomethoxylation of opium alkaloids and derivatives. *J Org Chem* 1998; 63:4392-6
34. Yaksh TL, Rudy TA: Chronic catheterization of the spinal subarachnoid space. *Physiol Behav* 1976; 17:1031-6
35. Laitinen JT: Selective detection of adenosine A1 receptor-dependent G-protein activity in basal and stimulated conditions of rat brain [35S]guanosine 5'-(gamma-thio)triphosphate autoradiography. *Neuroscience* 1999; 90:1265-79
36. Laitinen JT, Jokinen M: Guanosine 5'-(gamma-[35S]thio)triphosphate autoradiography allows selective detection of histamine H3 receptor-dependent G protein activation in rat brain tissue sections. *J Neurochem* 1998; 71:808-16
37. Sim LJ, Selley DE, Childers SR: *In vitro* autoradiography of receptor-activated G proteins in rat brain by agonist-stimulated guanylyl 5'-(gamma-[35S]thio)triphosphate binding. *Proc Natl Acad Sci U S A* 1995; 92:7242-6
38. Thompson CM, Wojno H, Greiner E, May EL, Rice KC, Selley DE: Activation of G-proteins by morphine and codeine congeners: insights to the relevance of O- and N-demethylated metabolites at mu- and delta-opioid receptors. *J Pharmacol Exp Ther* 2004; 308:547-54
39. Selley DE, Sim LJ, Xiao R, Liu Q, Childers SR: Mu-opioid receptor-stimulated guanosine-5'-O-(gamma-thio)triphosphate binding in rat thalamus and cultured cell lines: Signal transduction mechanisms underlying agonist efficacy. *Mol Pharmacol* 1997; 51:87-96
40. Traynor JR, Nahorski SR: Modulation by mu-opioid agonists of guanosine-5'-O-(3-[35S]thio)triphosphate binding to membranes from human neuroblastoma SH-SY5Y cells. *Mol Pharmacol* 1995; 47:848-54
41. Maher CE, Selley DE, Childers SR: Relationship of mu opioid receptor binding to activation of G-proteins in specific rat brain regions. *Biochem Pharmacol* 2000; 59:1395-401
42. Sim LJ, Selley DE, Dworkin SI, Childers SR: Effects of chronic morphine administration on mu opioid receptor-stimulated [35S]GTPγS autoradiography in rat brain. *J Neurosci* 1996; 16:2684-92
43. Ross FB, Smith MT: The intrinsic antinociceptive effects of oxycodone appear to be kappa-opioid receptor mediated. *Pain* 1997; 73:151-7
44. Kaiko RF, Benziger DP, Fitzmartin RD, Burke BE, Reder RF, Goldenheim PD: Pharmacokinetic-pharmacodynamic relationships of controlled-release oxycodone. *Clin Pharmacol Ther* 1996; 59:52-61
45. Heiskanen T, Olkkola KT, Kalso E: Effects of blocking CYP2D6 on the pharmacokinetics and pharmacodynamics of oxycodone. *Clin Pharmacol Ther* 1998; 64:603-11
46. Lalovic B, Phillips B, Risler LL, Howald W, Shen DD: Quantitative contribution of CYP2D6 and CYP3A to oxycodone metabolism in human liver and intestinal microsomes. *Drug Metab Dispos* 2004; 32:447-54
47. Xu M, Wei H, Kontinen VK, Kalso E, Pertovaara A: The dissociation of sedative from spinal antinociceptive effects following administration of a novel alpha-2-adrenoceptor agonist, MPV-2426, in the locus coeruleus in the rat. *Acta Anaesth Scand* 2000; 44:648-55
